# Supplementary material for: Effect of antenatal multiple micronutrient supplementation on anthropometry and blood pressure in mid-childhood in Nepal: follow-up of a double-blind randomised controlled trial
Source: PubMed Central journal article supplement (PMC4224012; doi:10.1016/s2214-109x(14)70314-6), 2014-11
Supplement: mmc1.pdf [file mmc1.pdf]

## Supplementary appendix

This appendix formed part of the original submission and has been peer reviewed. We post it as supplied by the authors.

Supplement to: Devakumar D, Chaube SS, Wells JCK, et al. Effect of antenatal multiple micronutrient supplementation on anthropometry and blood pressure in mid-childhood in Nepal: follow-up of a double-blind randomised controlled trial. *Lancet Glob Health* 2014; 2: e654–63.

## Supplementary Appendix

**Antenatal multiple micronutrient supplementation does not result in a difference in anthropometry and blood pressure in mid-childhood: follow-up of a double-blind randomized controlled trial in Nepal**

Devakumar D, Chaube SS, Wells JCK, Saville NM, Ayres JG, Manandhar DS, Costello A, Osrin D

### Contents

|                                                                                                                                            |   |
|--------------------------------------------------------------------------------------------------------------------------------------------|---|
| Supplementary table 1: Conditional growth: effect of antenatal multiple micronutrient supplements on growth at different time points ..... | 2 |
| Supplementary table 2: Self-reported illness over the last 12 months, by allocation group .....                                            | 2 |
| Supplementary Figure 1: Conceptual model.....                                                                                              | 3 |
| Supplementary Figure 2: Mortality in five periods of follow-up, by allocation .....                                                        | 4 |

|                | 2.5 years                      |                                     | 8.5 years                      |                                     |
|----------------|--------------------------------|-------------------------------------|--------------------------------|-------------------------------------|
|                | Unadjusted difference (95% CI) | Multivariable regression * (95% CI) | Unadjusted difference (95% CI) | Multivariable regression * (95% CI) |
| Weight-for-age | 0.08 (-0.06 to 0.22)           | 0.09 (-0.05 to 0.24)                | -0.06 (-0.20 to 0.08)          | -0.04 (-0.18 to 0.09)               |
| Height-for-age | 0.05 (-0.10 to 0.18)           | 0.08 (-0.04 to 0.21)                | -0.10 (-0.24 to 0.04)          | -0.09 (-0.12 to 0.04)               |

**Supplementary table 1: Conditional growth: effect of antenatal multiple micronutrient supplements on growth at different time points**

\* Multivariable regression models included variables describing air pollution, dietary diversity, food security, maternal education and height, household asset score and residence, using robust standard errors.

| Illness               | Control       |                 | Intervention  |                 |
|-----------------------|---------------|-----------------|---------------|-----------------|
|                       | Frequency (%) | Median episodes | Frequency (%) | Median episodes |
| Fever                 | 346 (82.0)    | 2               | 336 (80.2)    | 2               |
| Persistent diarrhoea* | 2 (0.5)       | 1               | 4 (1.0)       | 2               |
| Blood in stools       | 11 (2.6)      | 1               | 19 (4.5)      | 2               |
| Pneumonia             | 9 (2.1)       | 1               | 10 (2.4)      | 2               |
| Fast breathing        | 7 (1.7)       | 2               | 9 (2.2)       | 2               |
| Chest indrawing       | 8 (1.9)       | 1.5             | 7 (1.7)       | 2               |

**Supplementary table 2: Self-reported illness over the last 12 months, by allocation group**

\*Diarrhoea lasting for >13 days.

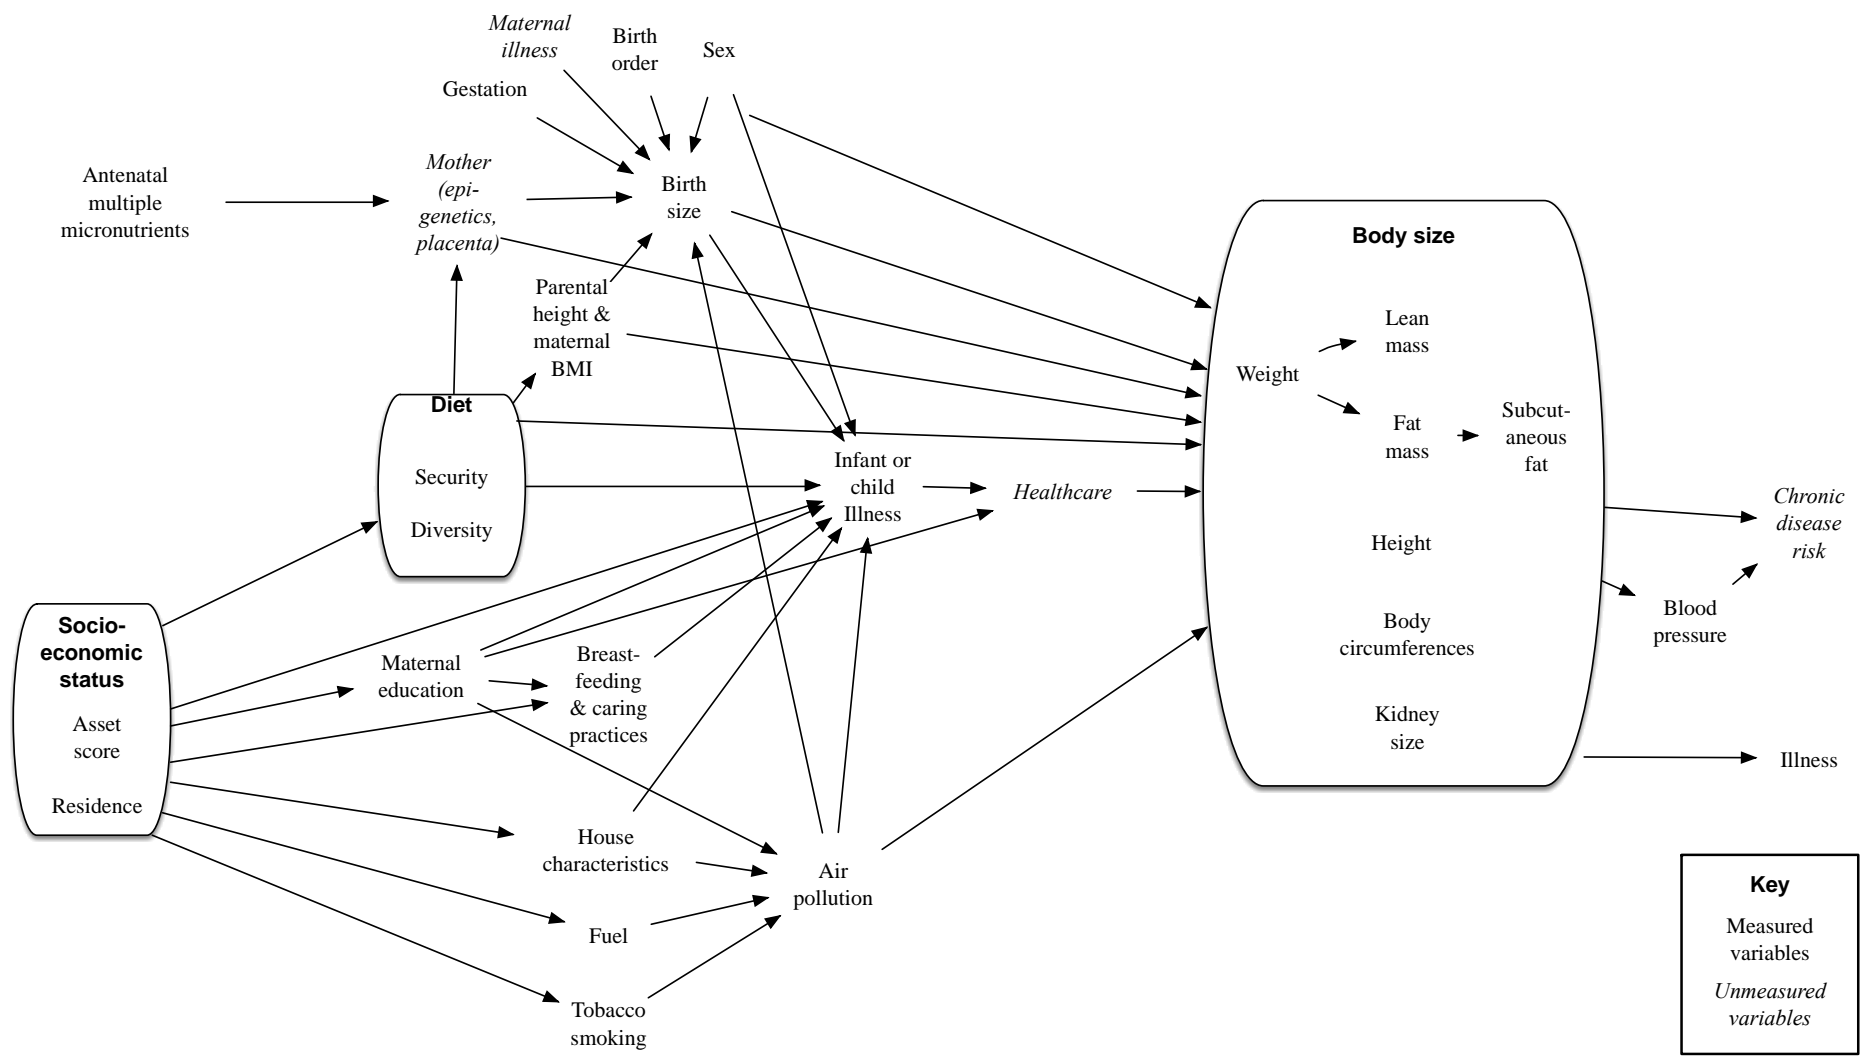

Supplementary Figure 1: Conceptual model

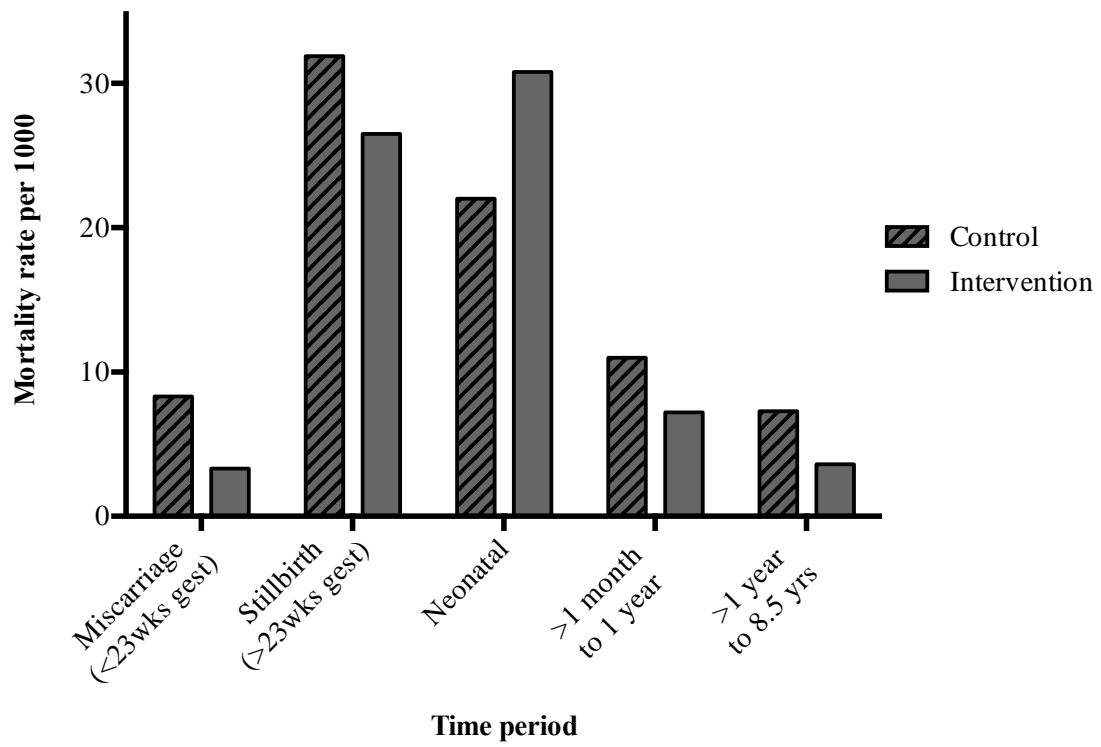

Supplementary Figure 2: Mortality in five periods of follow-up, by allocation
